# Supplementary material for: Pain, sleep and emotional well-being explain the lack of agreement between physician- and patient-perceived remission in early rheumatoid arthritis
Source: PubMed Central journal article supplement (PMC6390551; doi:10.1186/s41927-018-0024-9), 2018-06-26
Supplement: 41927_2018_24_MOESM1_ESM.pdf [file 41927_2018_24_MOESM1_ESM.pdf]

| Physician remission        | Remission according to physician (n=84) |                        |         |
|----------------------------|-----------------------------------------|------------------------|---------|
|                            | Remission physician                     | No remission physician | Total   |
| Patient remission, n(%)    | 36 (66)                                 | 9 (31)                 | 45 (54) |
| No patient remission, n(%) | 19 (35)                                 | 20 (69)                | 39 (46) |
| Total, n(%)                | 55 (65)                                 | 29 (36)                | 84      |

Additional file 1. Agreement between physician- (VAS ≤10 mm) and patient-perceived remission in different clinical definitions of response and remission.

Overall agreement between physician- and patient-perceived remission: 67%  
 Agreement between physician- and patient-perceived remission in patients in Boolean remission: 78%  
 Agreement between physician- and patient-perceived remission in patients with a good EULAR response: 65%  
 Agreement between physician- and patient-perceived remission in patients with an ACR70 response: 80%

| Boolean remission          | Remission (n=23, 27%) |                        |         | No remission (n=61, 73%) |                        |         |
|----------------------------|-----------------------|------------------------|---------|--------------------------|------------------------|---------|
|                            | Remission physician   | No remission physician | Total   | Remission physician      | No remission physician | Total   |
| Patient remission, n(%)    | 18 (86)               | 2 (100)                | 20 (87) | 18 (53)                  | 7 (26)                 | 25 (41) |
| No patient remission, n(%) | 3 (14)                | 0 (0)                  | 3 (13)  | 16 (47)                  | 20 (74)                | 36 (59) |
| Total, n(%)                | 21 (91)               | 2 (9)                  | 23      | 34 (56)                  | 27 (44)                | 61      |

| EULAR response             | Good (n=65, 77%)    |                        |         | Moderate (n=12, 14%) |                        |         | None responder (n=7, 8%) |                        |        |
|----------------------------|---------------------|------------------------|---------|----------------------|------------------------|---------|--------------------------|------------------------|--------|
|                            | Remission physician | No remission physician | Total   | Remission physician  | No remission physician | Total   | Remission physician      | No remission physician | Total  |
| Patient remission, n(%)    | 35 (69)             | 7 (50)                 | 42 (65) | 1 (33)               | 1 (11)                 | 2 (17)  | 0 (0)                    | 1 (17)                 | 1 (14) |
| No patient remission, n(%) | 16 (31)             | 7 (50)                 | 23 (35) | 2 (67)               | 8 (89)                 | 10 (83) | 1 (100)                  | 5 (83)                 | 6 (86) |
| Total, n(%)                | 51 (78)             | 14 (22)                | 65      | 3 (25)               | 9 (75)                 | 12      | 1 (14)                   | 6 (86)                 | 7      |

| ACR response               | ACR70 (n=25, 30%)   |                        |         | ACR50, but not ACR70 (n=10, 12%) |                        |        | ACR20, but not ACR50 (n=20, 24%) |                        |         | ACR non-responder (n=29, 35%) |                        |         |
|----------------------------|---------------------|------------------------|---------|----------------------------------|------------------------|--------|----------------------------------|------------------------|---------|-------------------------------|------------------------|---------|
|                            | Remission physician | No remission physician | Total   | Remission physician              | No remission physician | Total  | Remission physician              | No remission physician | Total   | Remission physician           | No remission physician | Total   |
| Patient remission, n(%)    | 20 (87)             | 2 (100)                | 22 (88) | 3 (50)                           | 3 (75)                 | 6 (60) | 3 (25)                           | 1 (13)                 | 4 (20)  | 10 (71)                       | 3 (20)                 | 13 (45) |
| No patient remission, n(%) | 3 (13)              | 0 (0)                  | 3 (12)  | 3 (50)                           | 1 (25)                 | 4 (40) | 9 (75)                           | 7 (88)                 | 16 (80) | 4 (29)                        | 12 (80)                | 16 (55) |
| Total, n(%)                | 23 (92)             | 2 (8)                  | 25      | 6 (60)                           | 4 (40)                 | 10     | 12 (60)                          | 8 (40)                 | 20      | 14 (48)                       | 15 (52)                | 29      |
